# Supplementary material for: Lattice strain controlled Ni@NiCu efficient anode catalysts for direct borohydride fuel cells
Source: Royal Society of Chemistry journal article supplement (doi:10.1039/d3dt02157b), 2023-01-01
Supplement: d3dt02157b1.pdf [file d3dt02157b1.pdf]

*Electronic supplementary information for*

**Lattice Strain Controlled Ni@NiCu Efficient Anode  
Catalysts for Direct Borohydride Fuel Cell**

*Bihao Hu<sup>a</sup>, Yuxin Xie<sup>a</sup>, Ying Yang<sup>a</sup>, Jiazhi Meng<sup>a</sup>, Jinliang Cai<sup>a</sup>, Changguo Chen<sup>a</sup>,*

*Danmei Yu<sup>a\*</sup>, Xiaoyuan Zhou<sup>b\*</sup>*

<sup>a</sup> School of Chemistry and Chemical Engineering, Chongqing University, Chongqing,  
401331, P.R. China

<sup>b</sup> College of Physics, Chongqing University, Chongqing, 401331, P.R. China

**Corresponding Authors**

**\*Danmei Yu's** e-mail: yudanmei-1@163.com.

**\*Xiaoyuan Zhou's** e-mail: xiaoyuan2013@cqu.edu.cn.

**Notes:** The authors declare no competing financial interest.

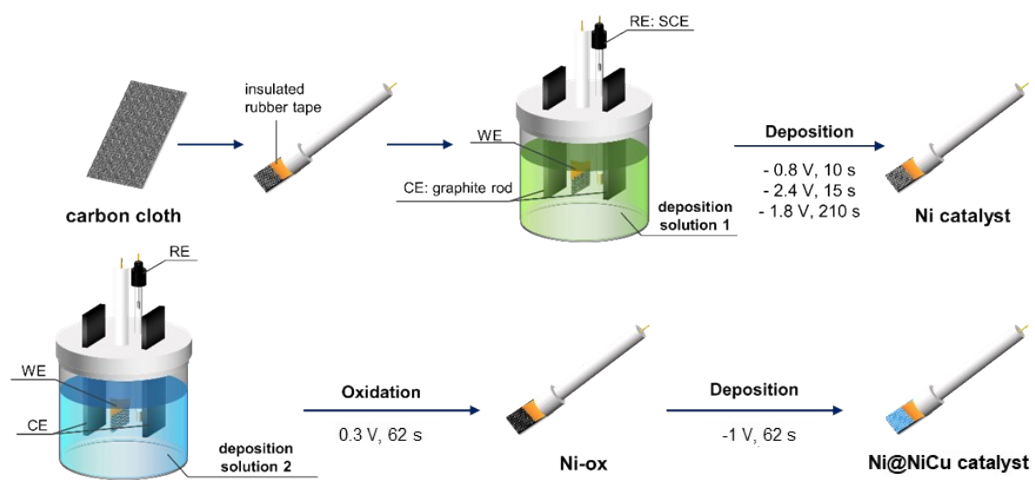

Fig. S1 Schematic diagram of the preparation catalysts.

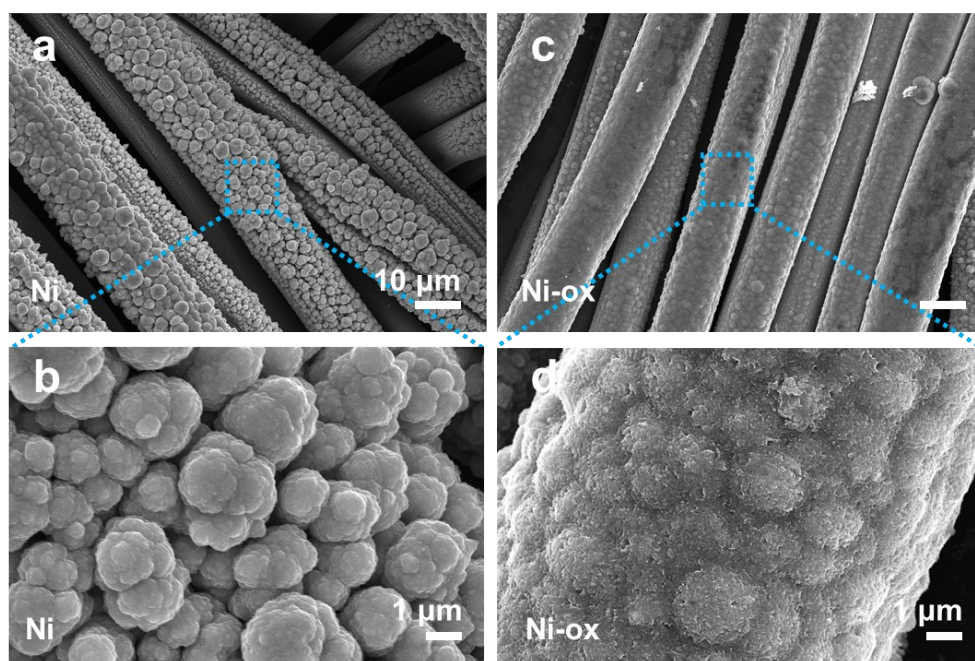

Fig. S2 (a) The SEM images and (b) the enlarged view of the Ni catalyst; (c) the SEM images and (d) the enlarge view of the Ni catalyst after oxidation (Ni-ox).

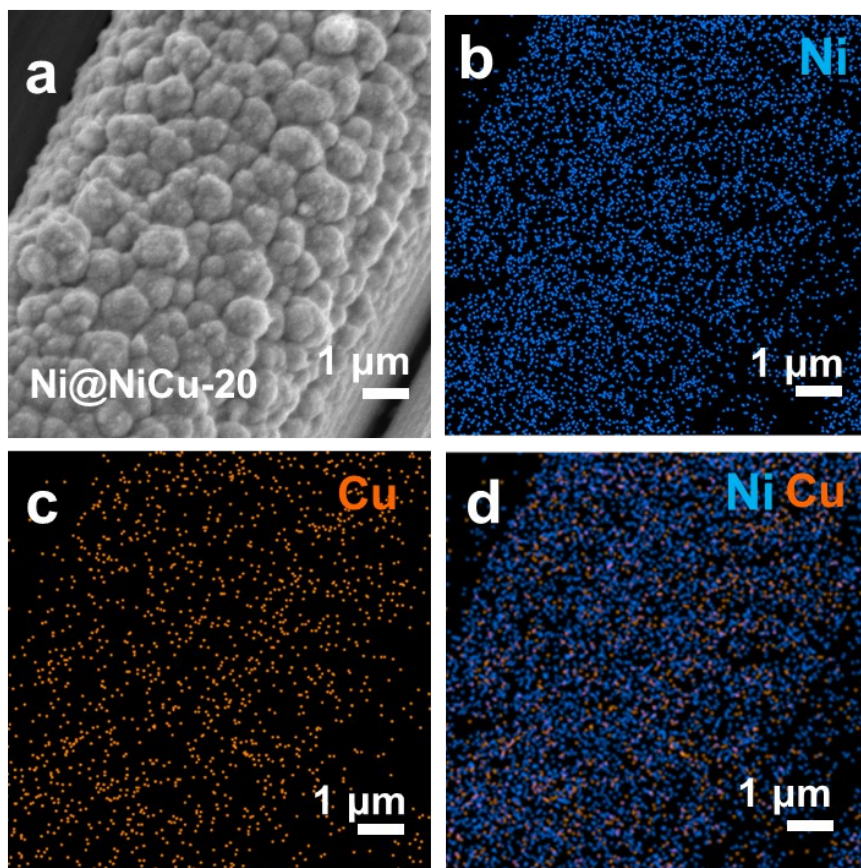

Fig. S3 (a) The SEM image of Ni@NiCu and (b-d) corresponding EDS element distribution mappings.

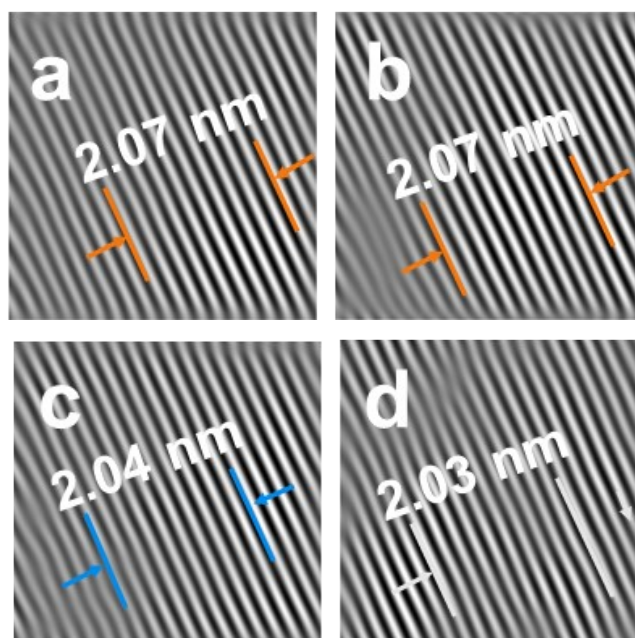

Fig. S4 (a-d) Processed lattice fringe images of boxes 1, 2, 3 and 4 in Fig. 2(a), respectively.

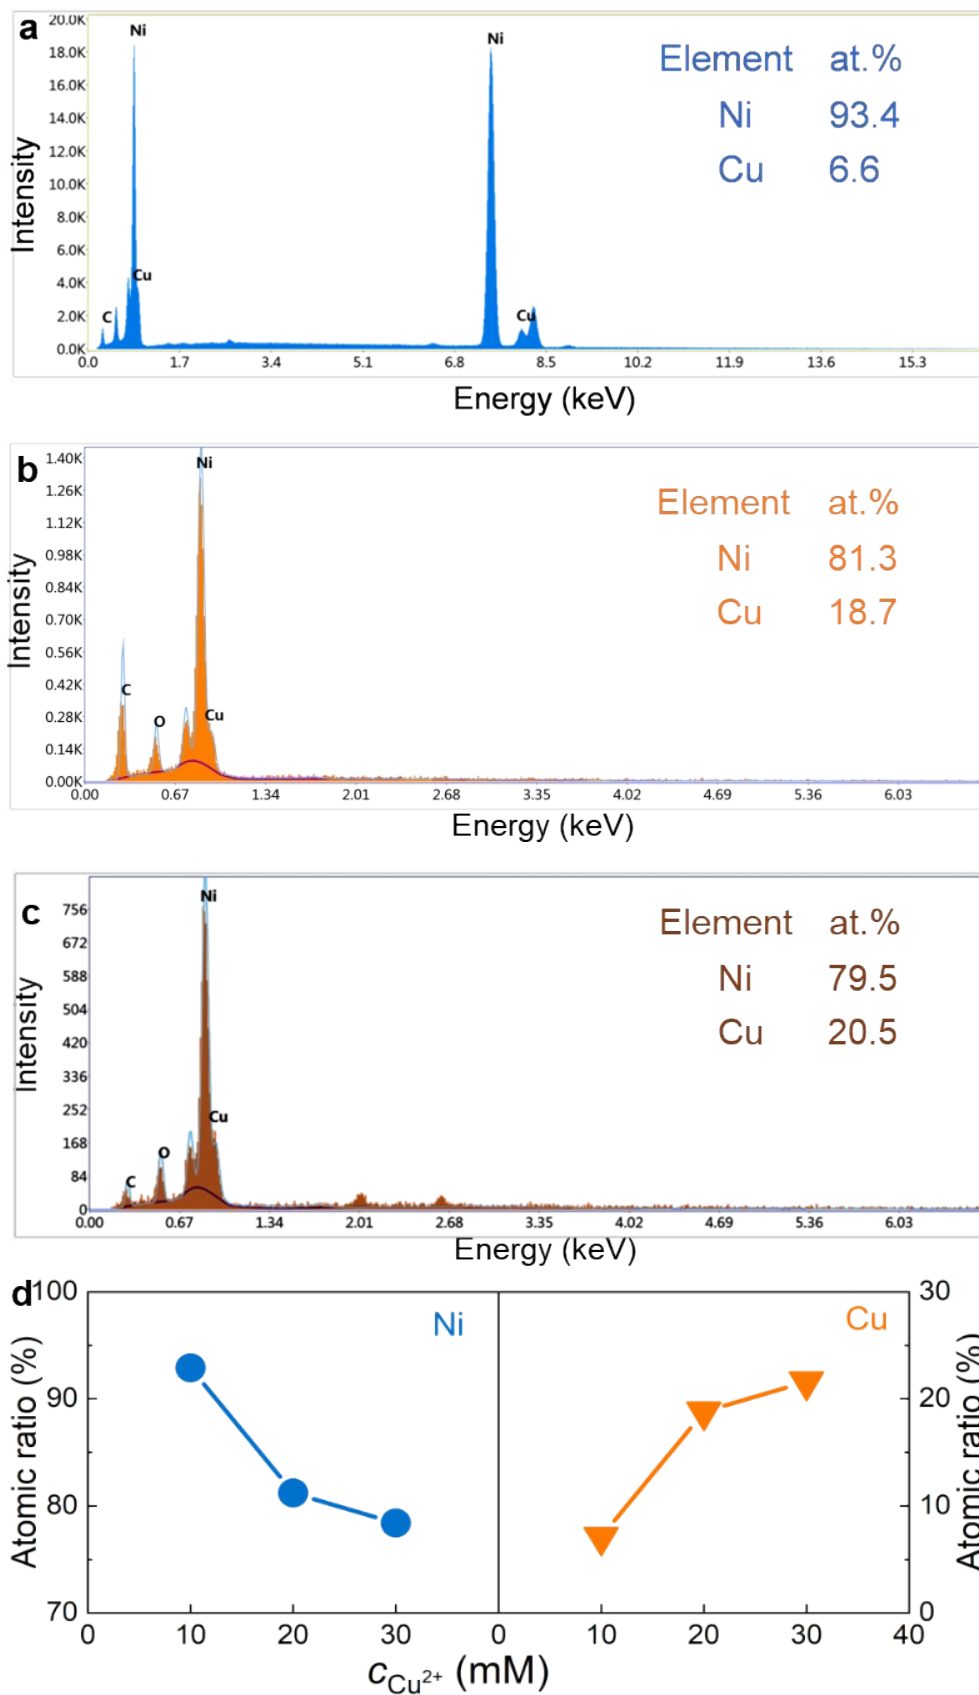

Fig. S5 SEM-EDS patterns of (a) Ni@Ni-10, (b) Ni@Ni-20, (c) Ni@Ni-30. (d) The correlation curves between the  $\text{Cu}^{2+}$  concentration in deposition solution and the contents of Ni and Cu in the Ni@NiCu-x catalysts.

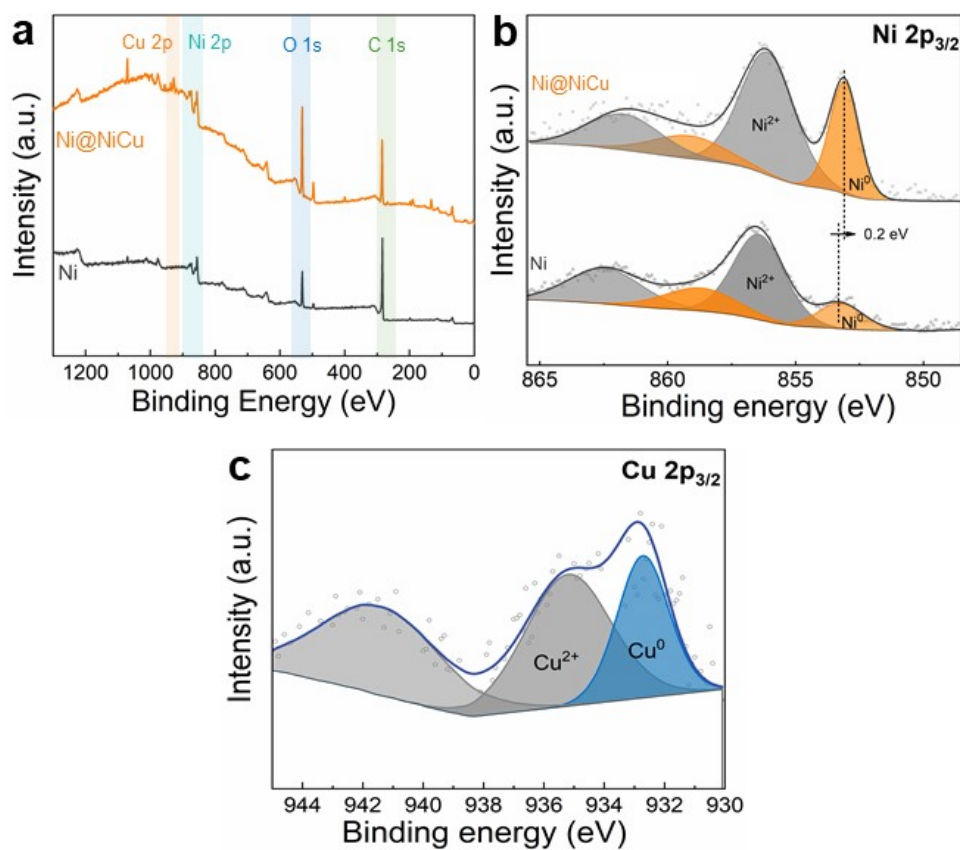

Fig. S6 (a) XPS surveys, (b) spectrums of Ni 2p<sub>3/2</sub>, and (c) Cu 2p<sub>3/2</sub> of Ni and Ni@NiCu catalysts.

The effect of tensile lattice stain on the electronic structure of Ni surface is evaluated by X-ray photoelectron spectroscopy (XPS), shown in Fig. S6. The peaks near 853 eV and 858.5 eV are corresponded to the metallic Ni (Ni<sup>0</sup>) and its satellite peaks,<sup>1</sup> while the peaks near 856.5 eV and 862 eV are attributed to Ni<sup>2+</sup> and its satellite peaks.<sup>2</sup> Moreover, the Cu<sup>0</sup> and Cu<sup>2+</sup> peaks in Ni@NiCu are located around 932.6 eV and 935.1 eV, respectively.

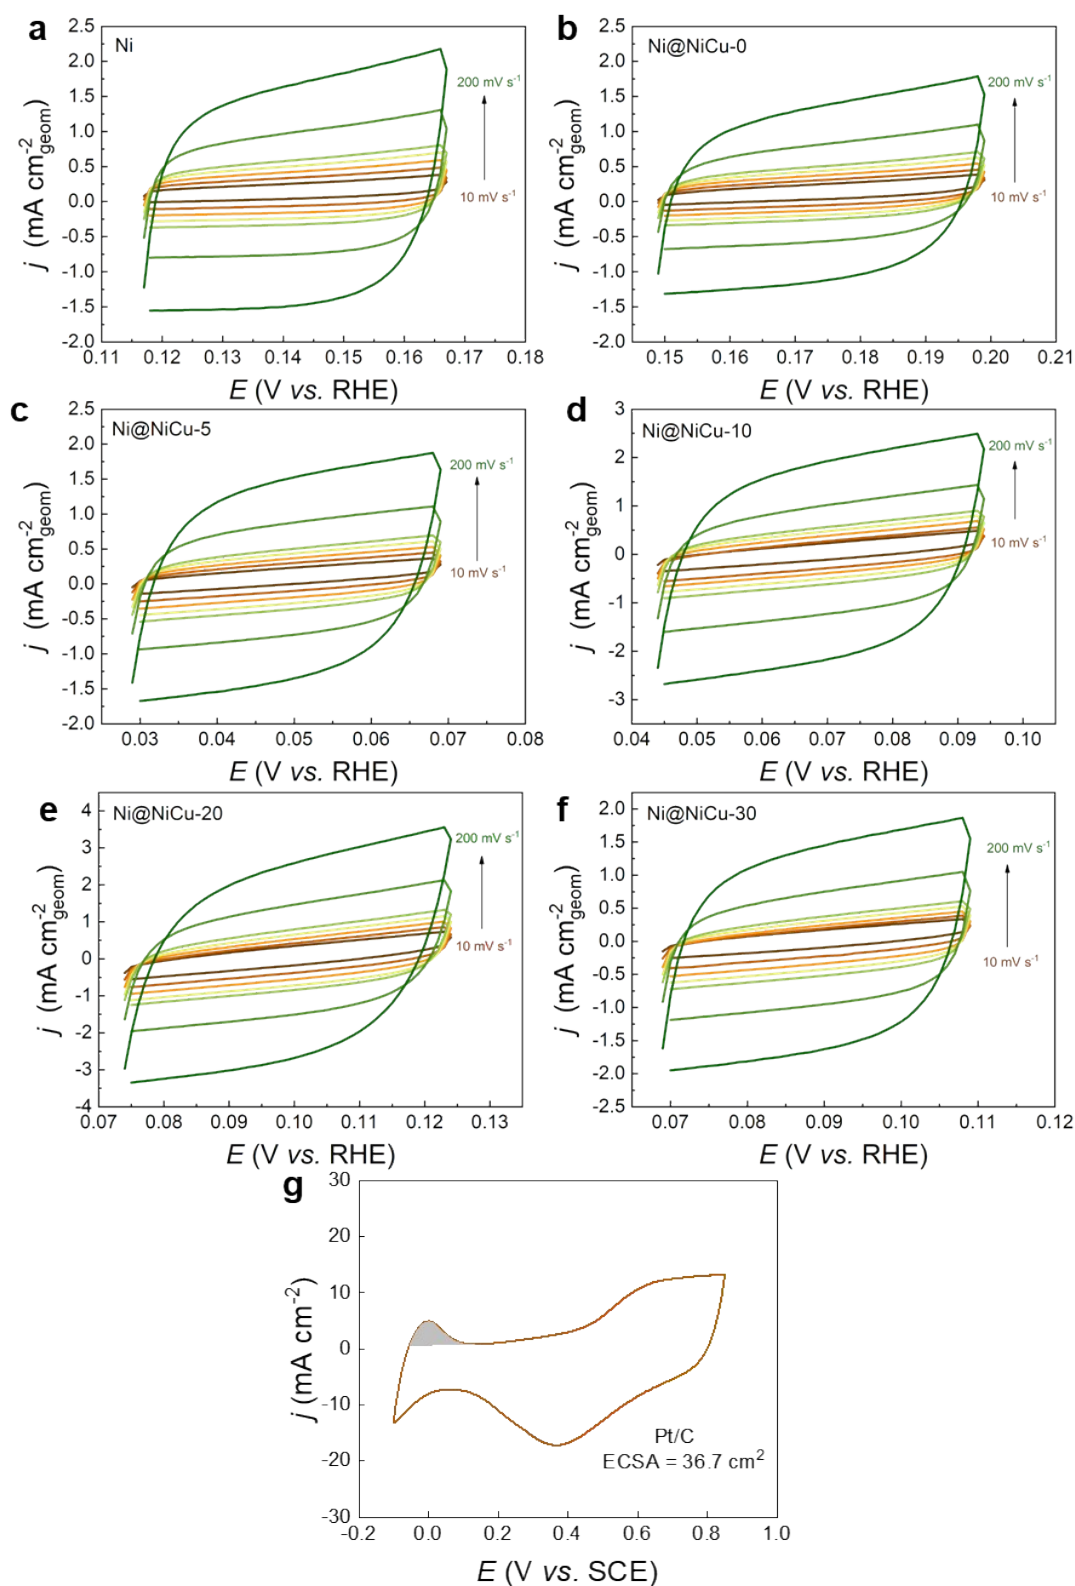

Fig. S7 CV curves on (a) Ni, (b) Ni@NiCu-0, (c) Ni@NiCu-5, (d) Ni@NiCu-10, (e) Ni@NiCu-20, (f) Ni@NiCu-30 catalysts in 1 mol L<sup>-1</sup> NaOH solution at various scan rates, and (g) CV curve on Pt/C in 0.1 M HClO<sub>4</sub> at a scan rate of 50 mV s<sup>-1</sup>. ECSA of Pt/C was calculated from a hydrogen adsorption peak from CV based on the equation:  $ECSA = Q_H / (210 \mu\text{C cm}^{-2})$ , where  $Q_H$  is the charge of hydrogen electro-adsorption calculated from the shaded area.

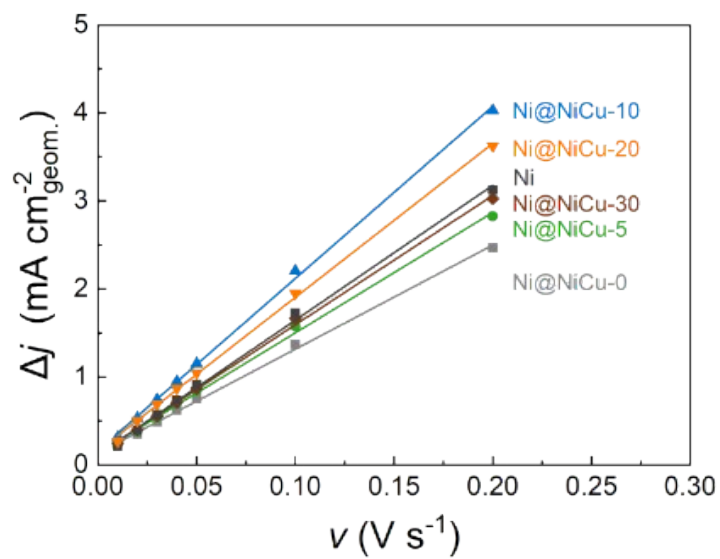

Fig. S8 The  $\nu \sim \Delta j$  relationship curves on different catalysts.

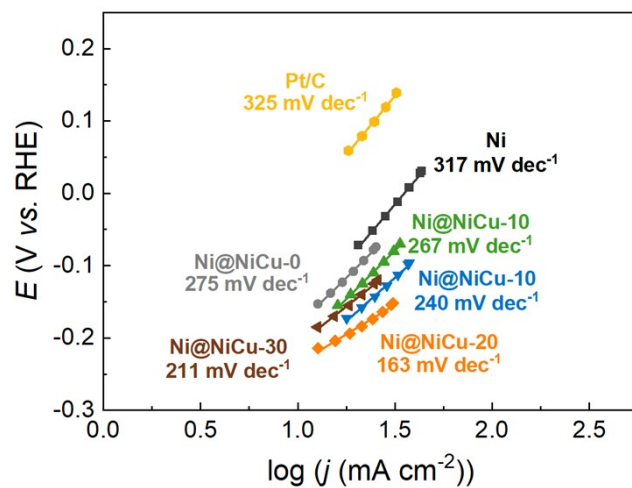

Fig. S9 The Tafel curves of BOR on Ni@NiCu-x, Ni, and commercial Pt/C catalysts in mixed a solution of 0.15 M NaBH<sub>4</sub> and 2 M NaOH at 25 °C.

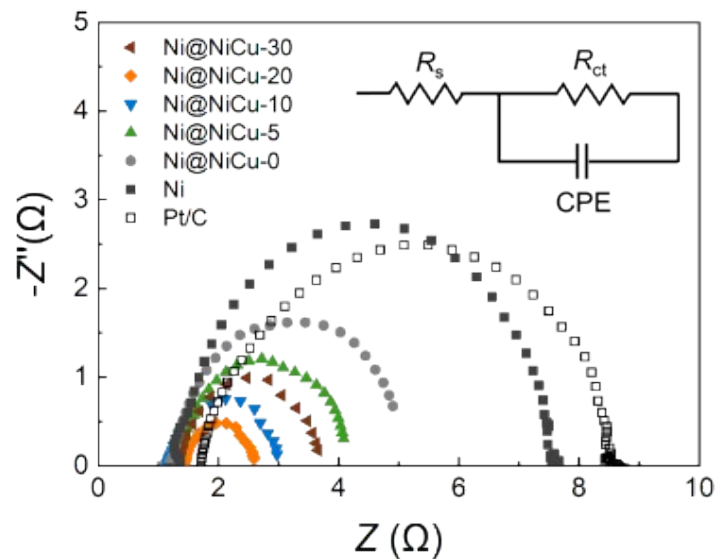

Fig. S10 The EIS of BOR on Ni@NiCu-x, Ni, and commercial Pt/C catalysts in 0.15 M NaBH<sub>4</sub> and 2 M NaOH mixed solution at 25 °C. The inset is the equivalent circuit.

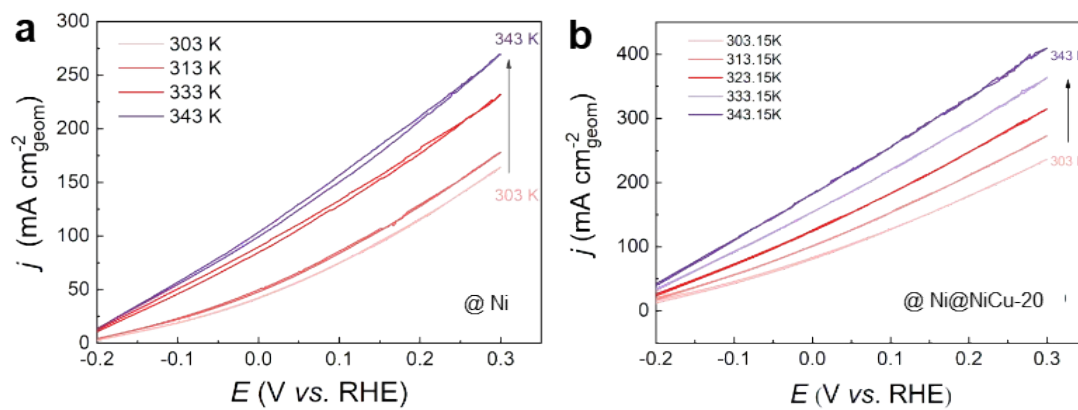

Fig. S11 The CV curves of BOR on (d) Ni and (e) Ni@NiCu-20 catalysts at different temperatures in a mixed solution of 0.15 M NaBH<sub>4</sub> and 2 M NaOH at a scan rate of 10 mV s<sup>-1</sup>.



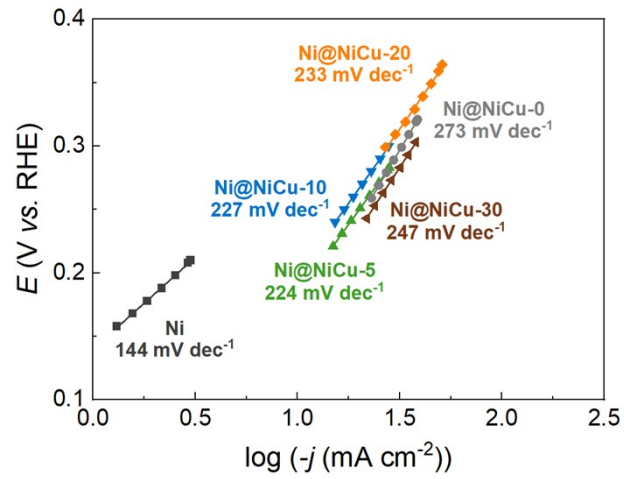

Fig. S12 The Tafel curves of HER on Ni@NiCu-x and Ni catalysts in 2 M NaOH solution at 25 °C.

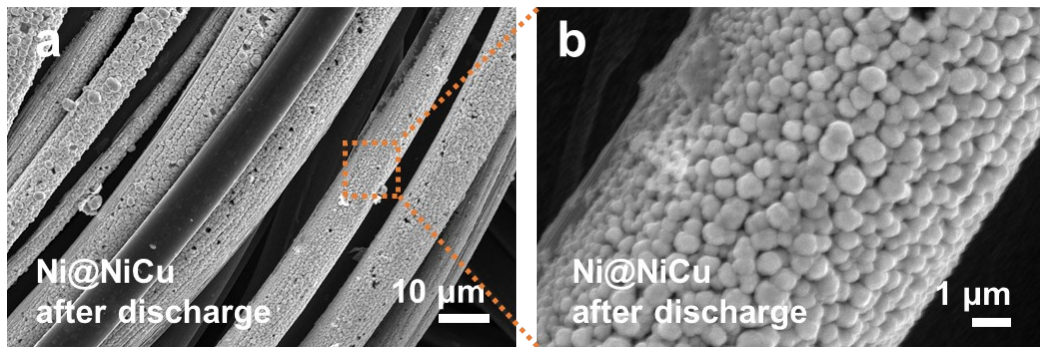

Fig. S13 SEM images of Ni@NiCu-20 after discharge.

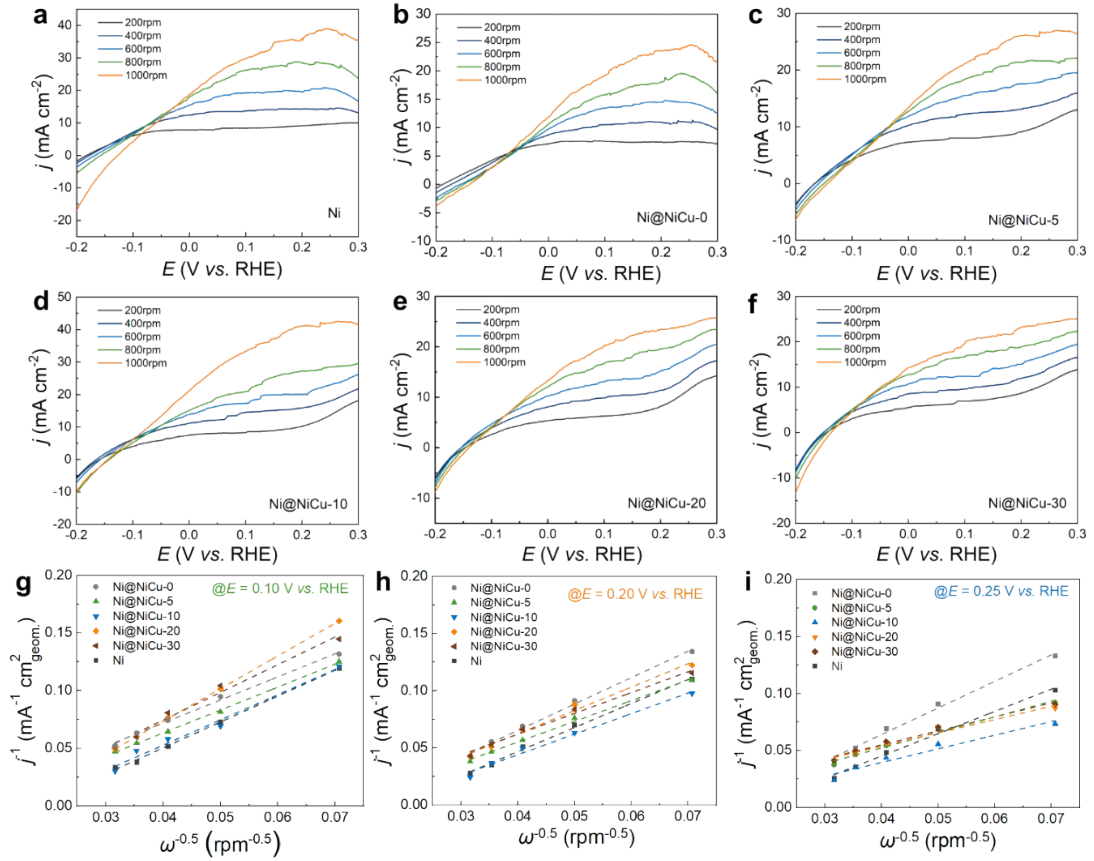

Fig. S14 CV curves of BOR on (a) Ni, (b) Ni@NiCu-0, (c) Ni@NiCu-5, (d) Ni@NiCu-10, (e) Ni@NiCu-20, and (f) Ni@NiCu-30 catalyst electrodes at various rotate speeds; Koutecky-Levich plots of BOR on Ni@NiCu-x and Ni catalyst electrodes at (g) 0.10 V, (h) 0.20 V, and (i) 0.25 V vs. RHE.

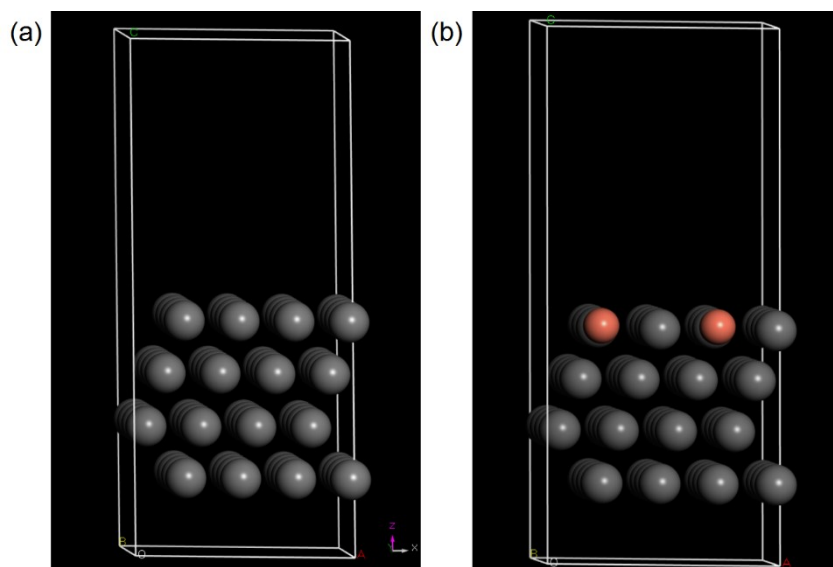

Fig. S15 Surface structure of (a) Ni-0% and (b) Ni@NiCu-2%, the grey and orange denote Ni and Cu atoms, respectively.

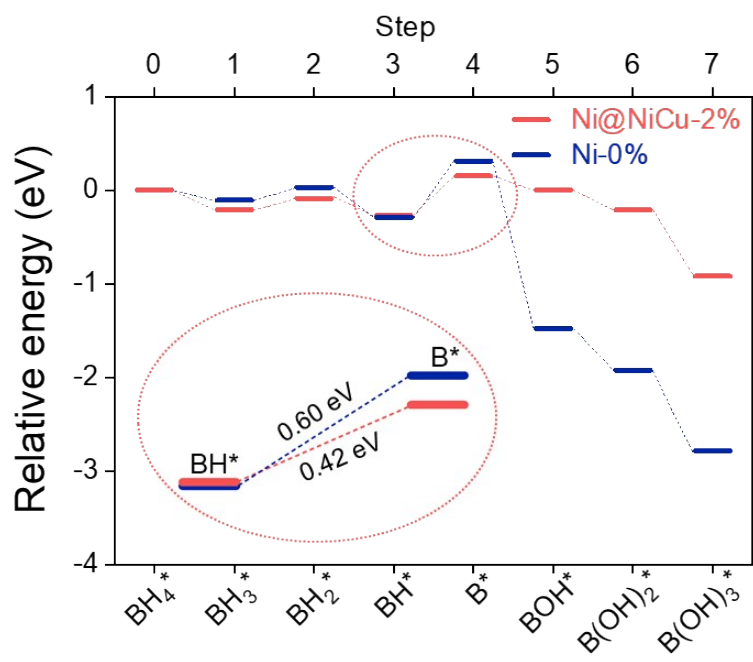

Fig. S16 Reaction pathway of BOR on Ni@NiCu-2% and Ni-0% at 0 V vs. RHE.

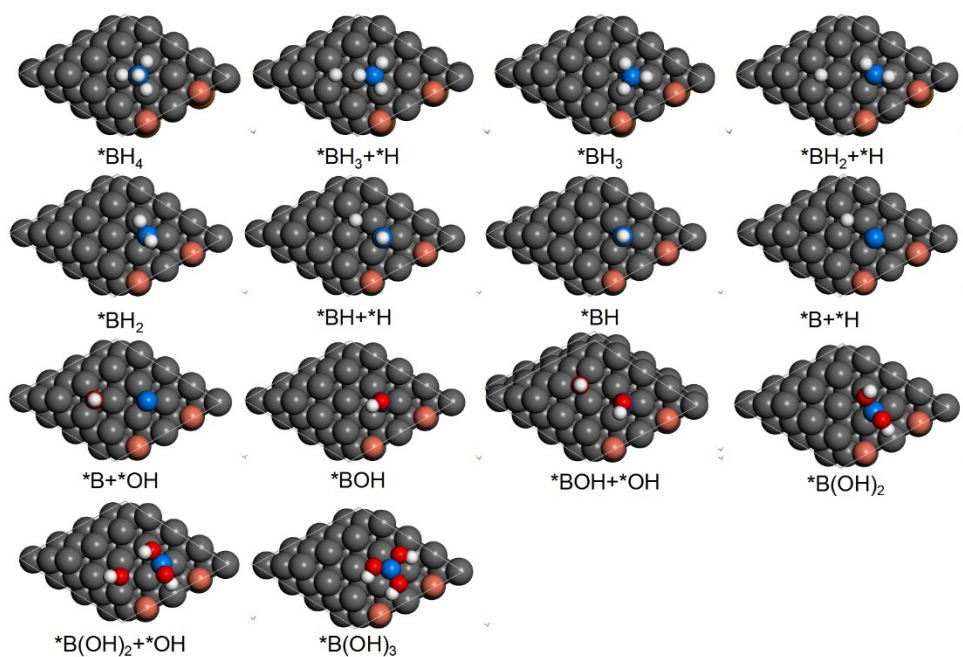

Fig. S17 Optimized structures of corresponding reaction intermediates in BOR on the Ni@NiCu-2% surface, the Ni, B, O and H atoms are denoted by gray, blue, red, and white balls, respectively.

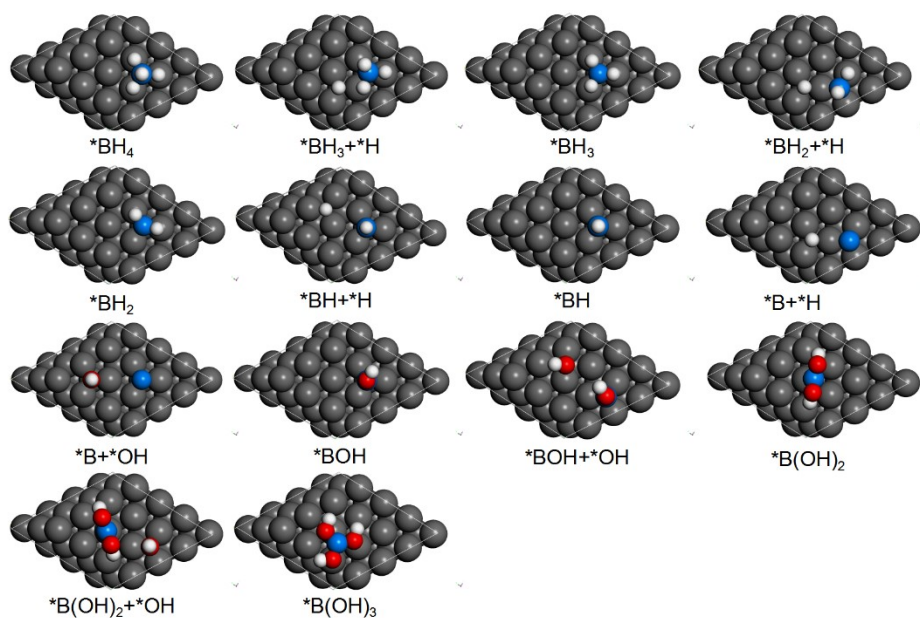

Fig. S18 Optimized structures of corresponding reaction intermediates in BOR on the Ni-0% surface, the Ni, B, O and H atoms are denoted by gray, blue, red, and white balls, respectively.

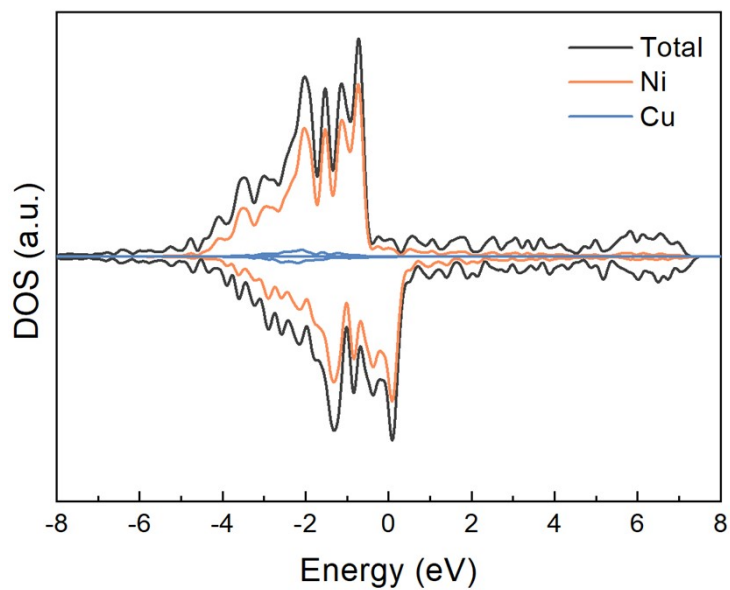

Fig. S19 Projected DOS of the Ni@NiCu-2%.

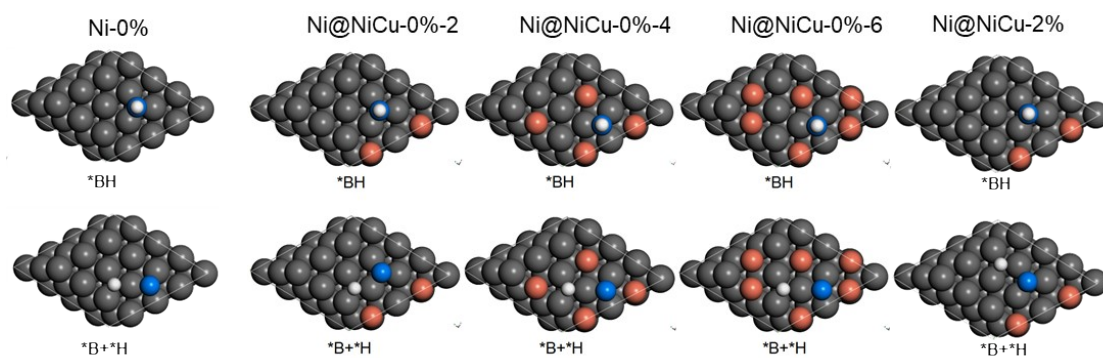

Fig. S20 Optimized structures of corresponding reaction intermediates in BOR on the Ni-0%, Ni@NiCu-0%-x, and Ni@NiCu-2% surface, the Ni, B, O and H atoms are denoted by gray, blue, red, and white balls, respectively.

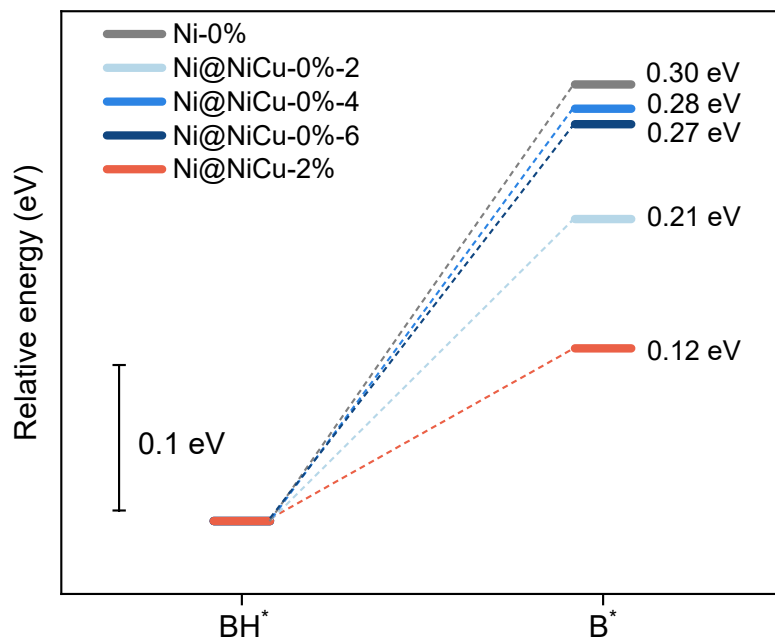

Fig. S21 Energy barrier for the fourth decoupling of B-H bond on Ni-0%, Ni@NiCu-0%-x, and Ni@NiCu-2% at 0.3 V vs. RHE.

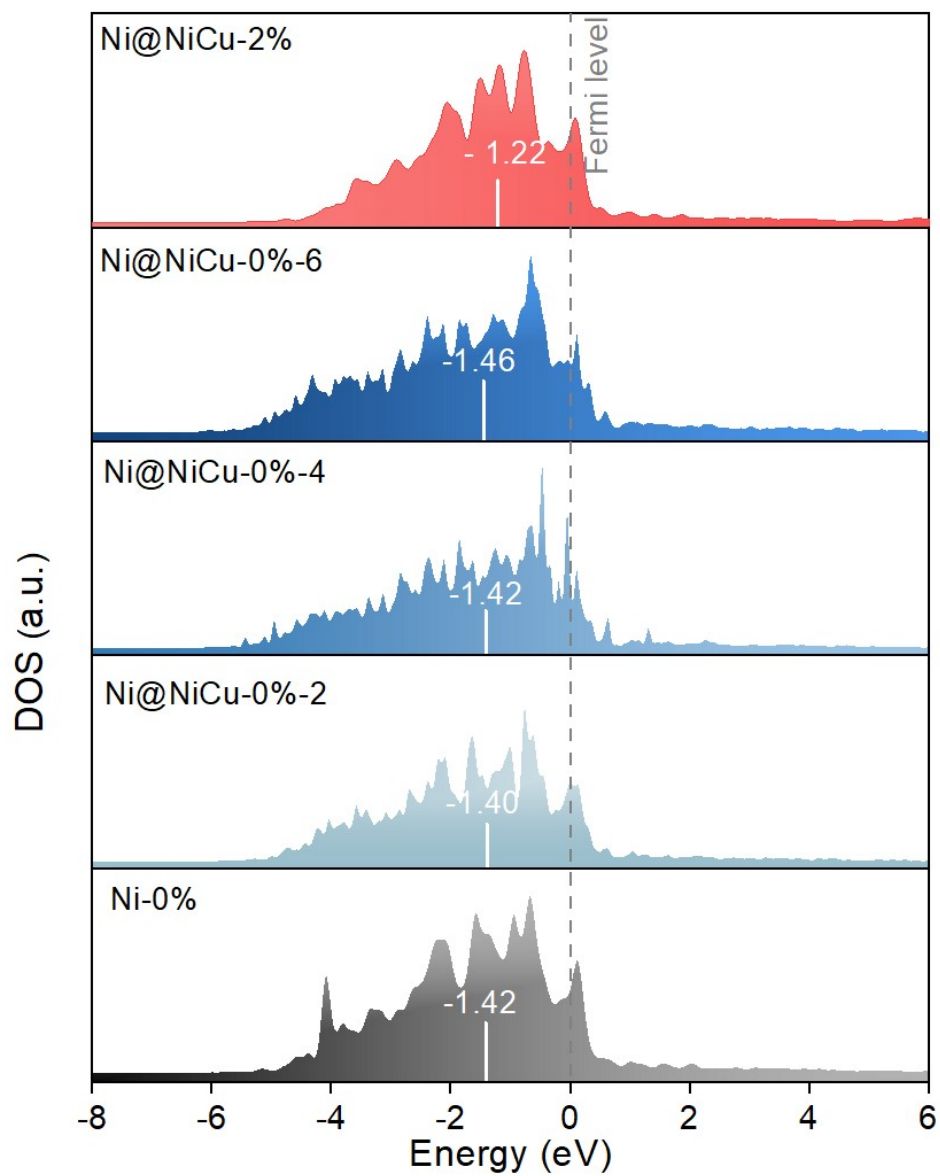

Fig. S22 Comparison of the density of state of 3d orbitals of Ni-0%, Ni@NiCu-0%-x, and Ni@NiCu-2%.

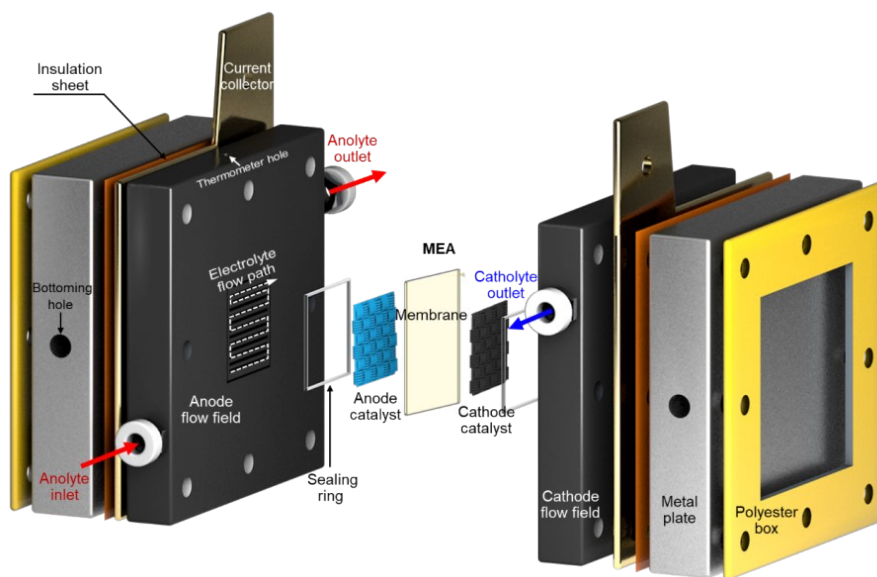

Fig. S23 Configuration schematic diagram of DBFC unit.

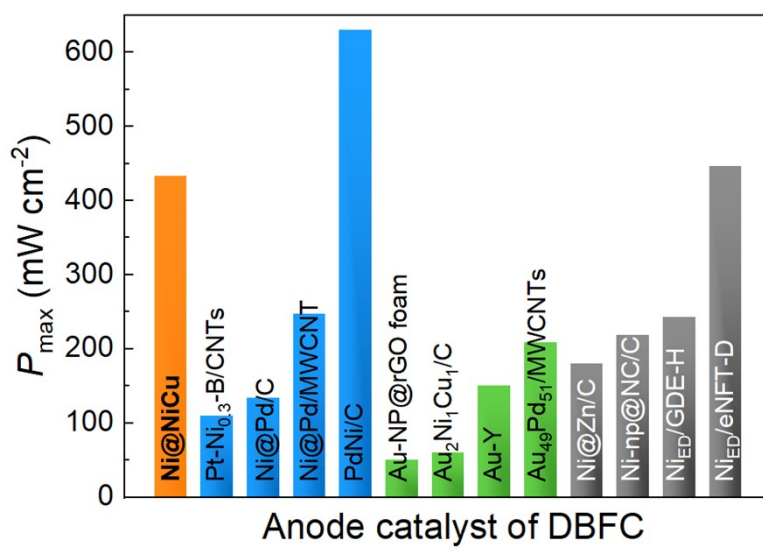

Fig. S24 Performance comparison of DBFCs.



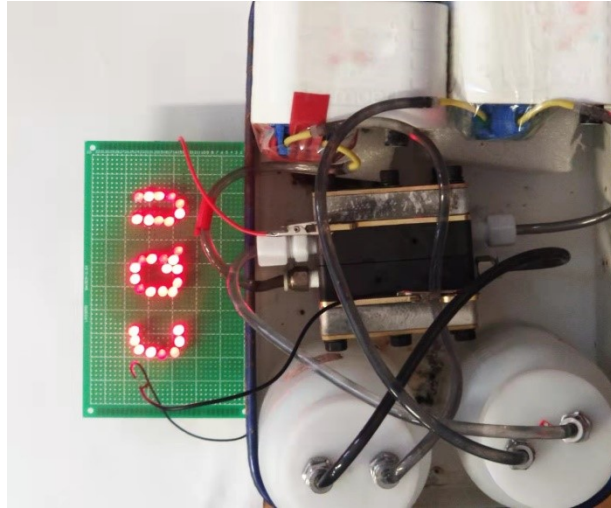

Fig. S25 Practical application of the DBFC with the Ni@NiCu anode.

Table S1 XRD refinement results of prepared catalysts.

| Catalyst   | lattice parameter (Å) | $\varepsilon_{\text{micro}}$ (%) | SA- $\varepsilon_{\text{micro}}$ (%) |
|------------|-----------------------|----------------------------------|--------------------------------------|
| Ni         | 3.522253              | 0.058321                         | 0.00269                              |
| Ni@NiCu-0  | 3.523355              | 0.011008                         | 0.0004                               |
| Ni@NiCu-10 | 3.524195              | 0.203011                         | 0.016424                             |
| Ni@NiCu-20 | 3.524439              | 0.062177                         | 0.005174                             |
| Ni@NiCu-30 | 3.5244392             | 0.021008                         | 0.00062                              |

Table S2 Summaries of electrocatalytic activities of prepared catalysts towards BOR.

| Catalyst   | $j$ @0.3 V<br>(mA cm <sup>-2</sup> ) | Tafel slope<br>(mV dec <sup>-1</sup> ) | $R_{\text{ct}}$<br>(Ω) | $C_{\text{dl}}$<br>(mF) |
|------------|--------------------------------------|----------------------------------------|------------------------|-------------------------|
| Ni         | 132                                  | 317                                    | 6.10                   | 7.22                    |
| Pt/C       | 69                                   | 325                                    | 5.48                   | -                       |
| Ni@NiCu-0  | 135                                  | 275                                    | 3.51                   | 9.52                    |
| Ni@NiCu-5  | 177                                  | 267                                    | 2.61                   | 8.89                    |
| Ni@NiCu-10 | 219                                  | 240                                    | 1.68                   | 7.98                    |
| Ni@NiCu-20 | 246                                  | 163                                    | 1.08                   | 8.41                    |
| Ni@NiCu-30 | 198                                  | 211                                    | 2.15                   | 7.27                    |

Table S3 The catalytic activities to BOR (at ~ 0.3 V vs. RHE) achieved by some typical noble-metal-based and Ni-based catalysts developed in recent years.

| Catalyst                                                     | Testing condition                         | $j_{\text{ECSA}}$<br>(mA cm <sup>-2</sup> <sub>Cat.</sub> ) | Reference        |
|--------------------------------------------------------------|-------------------------------------------|-------------------------------------------------------------|------------------|
| <b>Ni@NiCu-20</b>                                            | <b>0.15 M NaBH<sub>4</sub> + 2 M NaOH</b> | <b>6.57</b>                                                 | <b>This work</b> |
| PdNi/C                                                       | 0.05 M NaBH <sub>4</sub> + 1 M KOH        | 0.45                                                        | 3                |
| Pd/C                                                         | 0.05 M NaBH <sub>4</sub> + 1 M KOH        | 0.15                                                        | 3                |
| Co-Ni-B                                                      | 0.1 M KBH <sub>4</sub> + 1 M KOH          | 0.55                                                        | 4                |
| Ni <sub>ED</sub> /eNFT                                       | 0.05 M NaBH <sub>4</sub> + 1 M NaOH       | 0.13                                                        | 5                |
| Ni-np@NC                                                     | 0.135 M NaBH <sub>4</sub> + 2 M NaOH      | 2.14                                                        | 6                |
| Ni@Zn                                                        | 0.135 M NaBH <sub>4</sub> + 2 M NaOH      | 1.8                                                         | 7                |
| Pt <sub>67</sub> Fe <sub>33</sub> /C                         | 0.1 M NaBH <sub>4</sub> + 3 M NaOH        | 1.64                                                        | 8                |
| Cu <sub>51</sub> Ni <sub>137</sub> Pd <sub>12</sub> @Ni foam | 0.3 M NaBH <sub>4</sub> + 2 M NaOH        | 0.15                                                        | 9                |

## Reference

- 1 A. Roustila, C. Severac, J. Chêne and A. Percheron-Guégan, *Surf Sci*, 1994, **311**, 33–44.
- 2 Z. Huang, Z. Chen, Z. Chen, C. Lv, H. Meng and C. Zhang, *ACS Nano*, 2014, **8**, 8121–8129.
- 3 S. Saha, P. Gayen, Z. Wang, R. J. Dixit, K. Sharma, S. Basu and V. K. Ramani, *ACS Catal*, 2021, **11**, 8417–8430.
- 4 Y. e. Duan, S. Li, Q. Tan, Y. Chen, K. Zou, X. Dai, M. Bayati, B. B. Xu, L. Dala and T. X. Liu, *Int J Hydrogen Energy*, 2021, **46**, 15471–15481.
- 5 G. Braesch, Z. Wang, S. Sankarasubramanian, A. G. Oshchepkov, A. Bonnefont, E. R. Savinova, V. Ramani and M. Chatenet, *J Mater Chem A Mater*, 2020, **8**, 20543–20552.
- 6 B. Hu, J. Yu, J. Meng, C. Xu, J. Cai, B. Zhang, Y. Liu, D. Yu, X. Zhou and C. Chen, *ACS Appl Mater Interfaces*, 2022, **14**, 3910–3918.
- 7 B. Hu, P. Chen, C. Xu, J. Meng, J. Cai, Y. Yang, B. Zhang, D. Yu, X. Zhou and C. Chen, *Appl Catal B*, 2022, **307**, 121183.
- 8 L. Yi, B. Yu, W. Yi, Y. Zhou, R. Ding and X. Wang, *ACS Sustain Chem Eng*, 2018, **6**, 8142–8149.
- 9 C. Song, G. Wang, B. Li, C. Miao, K. Ma, K. Zhu, K. Cheng, K. Ye, J. Yan, D. Cao and J. Yin, *Electrochim Acta*, 2019, **299**, 395–404.
